# Supplementary material for: Vascular deficiency of Smad4 causes arteriovenous malformations: a mouse model of Hereditary Hemorrhagic Telangiectasia
Source: PubMed Central journal article supplement (PMC5878194; doi:10.1007/s10456-018-9602-0), 2018-02-19

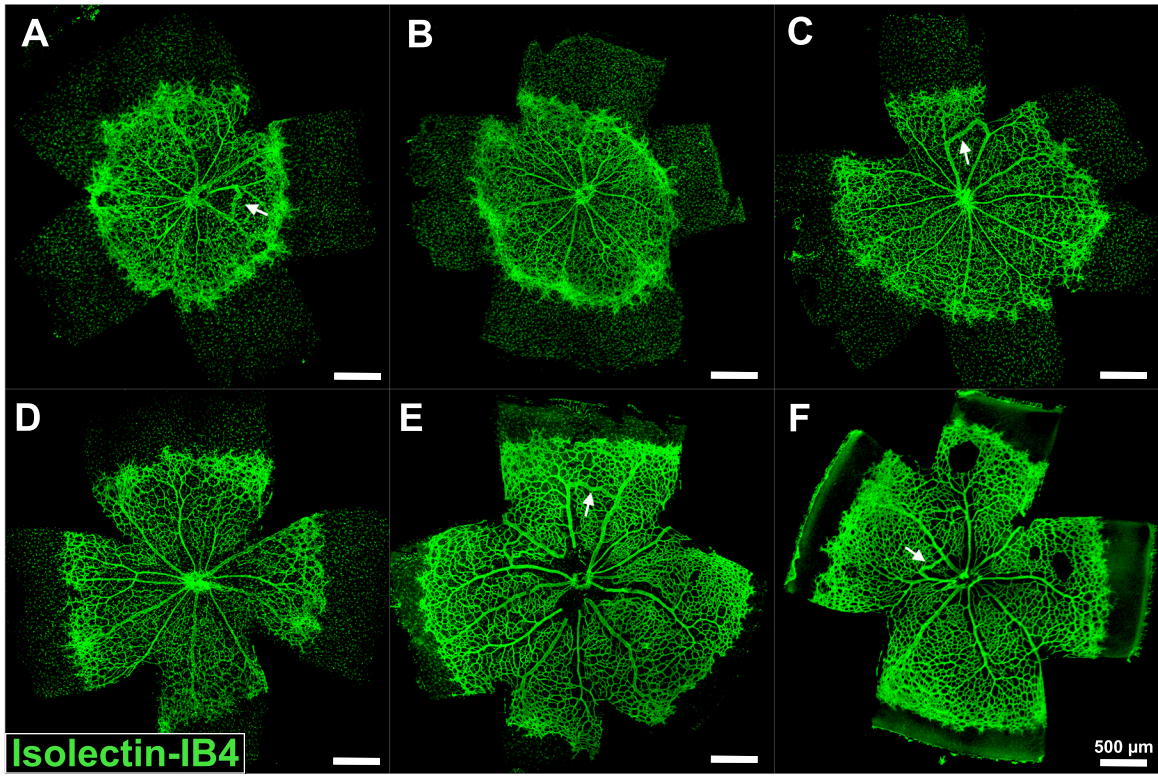

Supplement: 10456_2018_9602_MOESM4_ESM.pdf [file 10456_2018_9602_MOESM4_ESM.pdf]
