# Supplementary material for: Vascular deficiency of Smad4 causes arteriovenous malformations: a mouse model of Hereditary Hemorrhagic Telangiectasia
Source: Springer Nature journal article supplement (doi:10.1007/s10456-018-9602-0), 2018-02-19

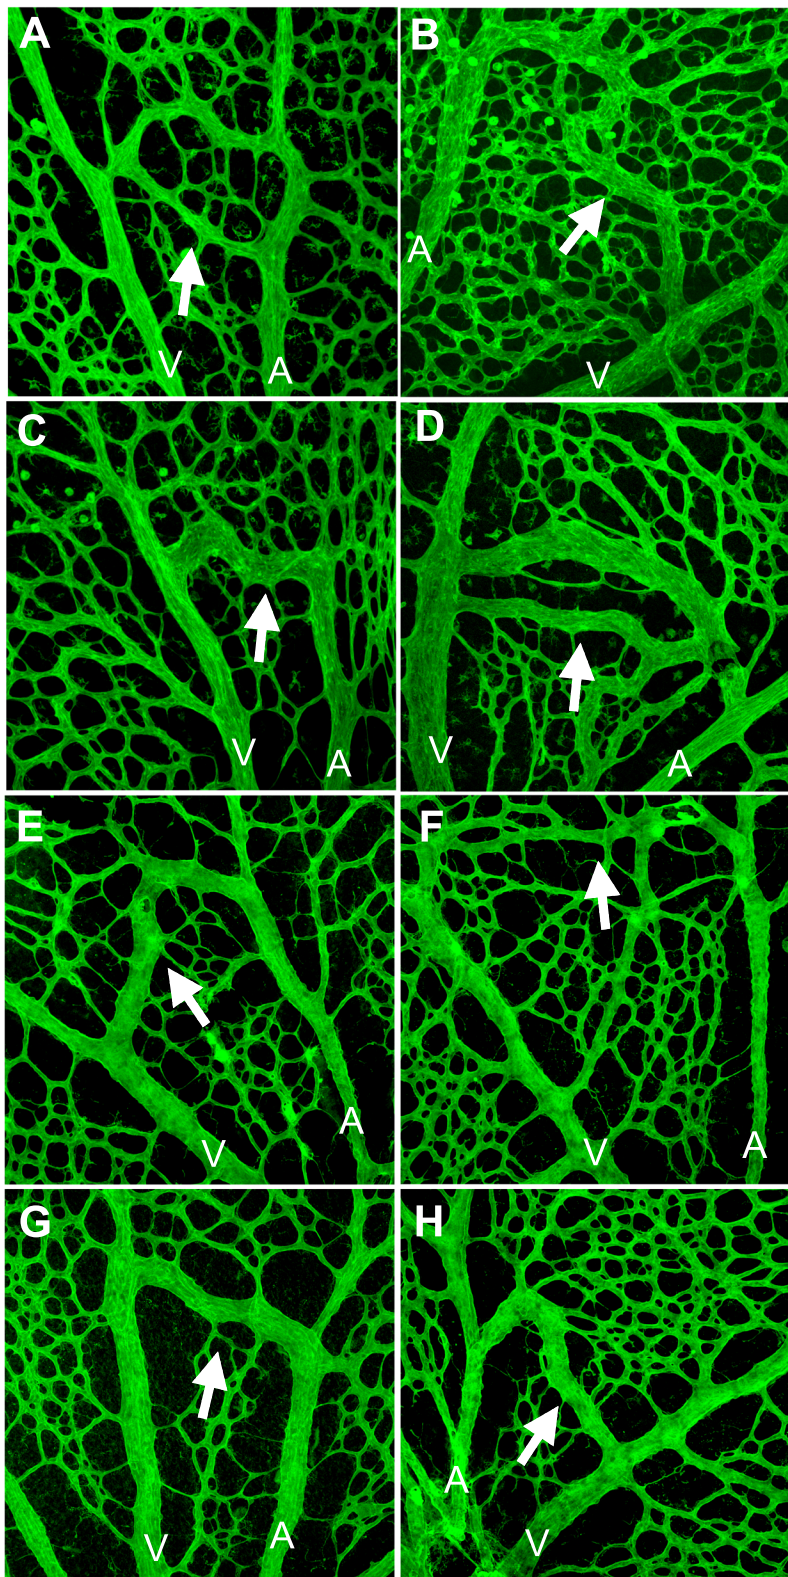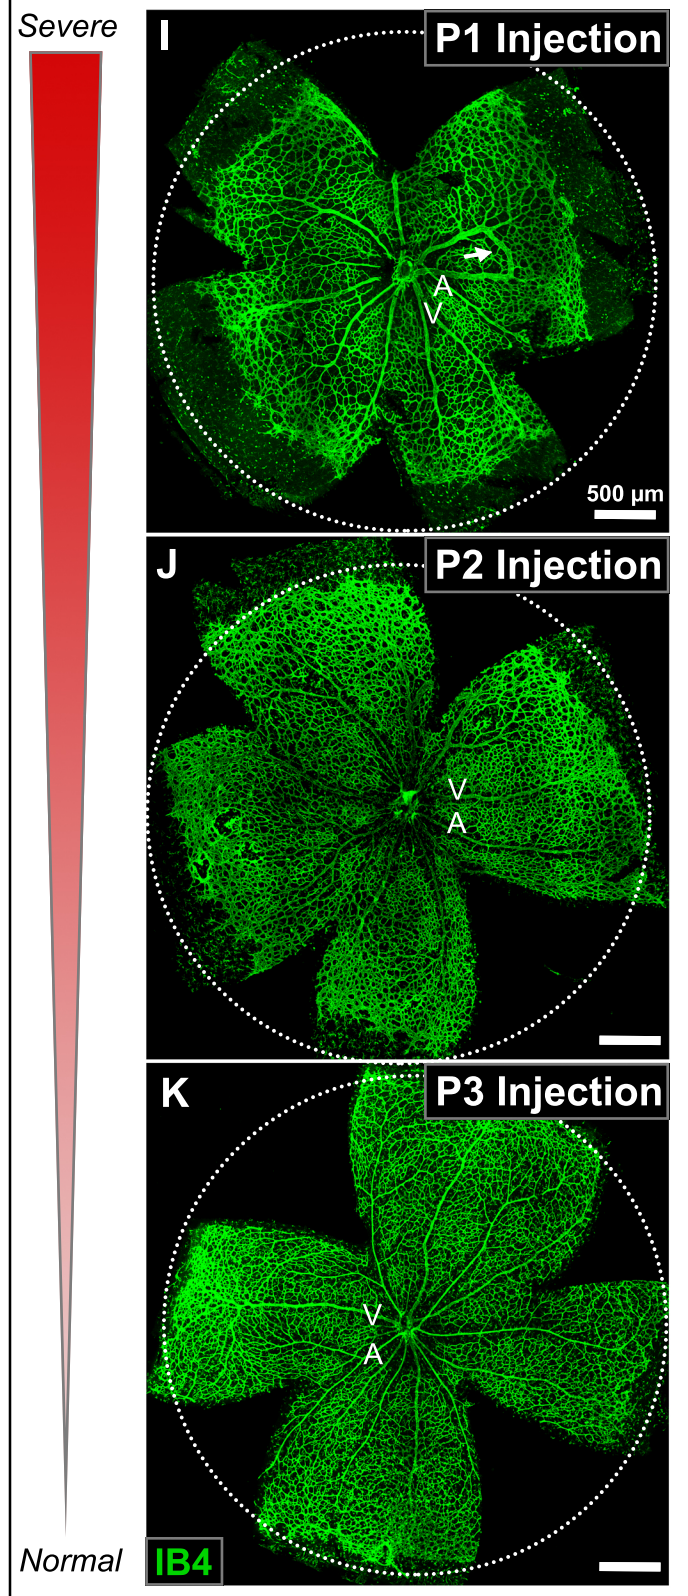

Supplement: MOESM2 [file 15474448]
